# Supplementary material for: Estimating Dependence Among Lumber Strength Properties With Copula Models
Source: Frontiers journal article supplement (doi:10.3389/fams.2020.578614), 2021-02-15
Supplement: Data_Sheet_1.ZIP [file Data_Sheet_1.ZIP]

$$\boxed{X} \overset{XZ}{\text{---}} \boxed{Z} \overset{YZ}{\text{---}} \boxed{Y} \quad T_1$$

$$\boxed{XZ} \overset{XY;Z}{\text{---}} \boxed{YZ} \quad T_2$$
