# Supplementary figures and images for: Estimating Dependence Among Lumber Strength Properties With Copula Models
Source: Frontiers journal article supplement (doi:10.3389/fams.2020.578614), 2021-02-15

profile -loglik for R100

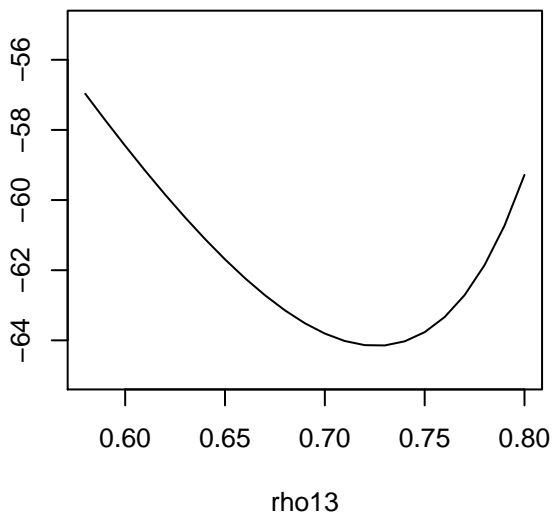

profile -loglik for T100

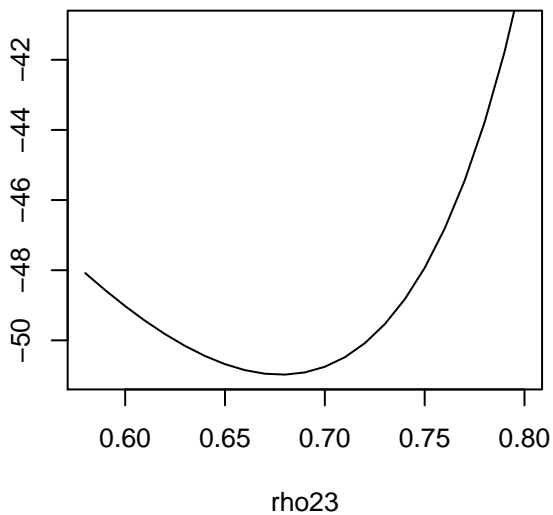

profile -loglik for R20/T20

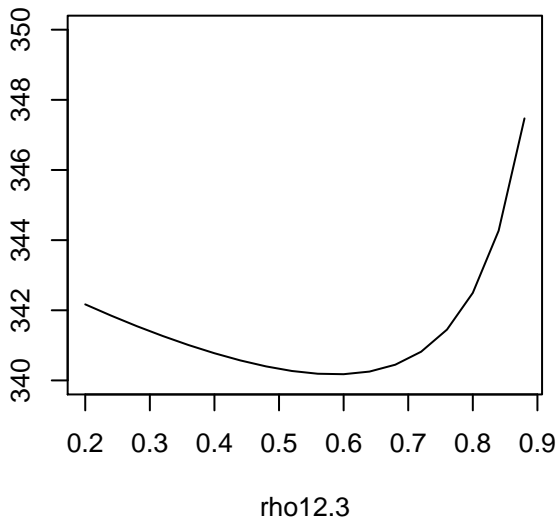

Supplement: Data_Sheet_1.ZIP [file Data_Sheet_1.ZIP]

**QQ-plot**

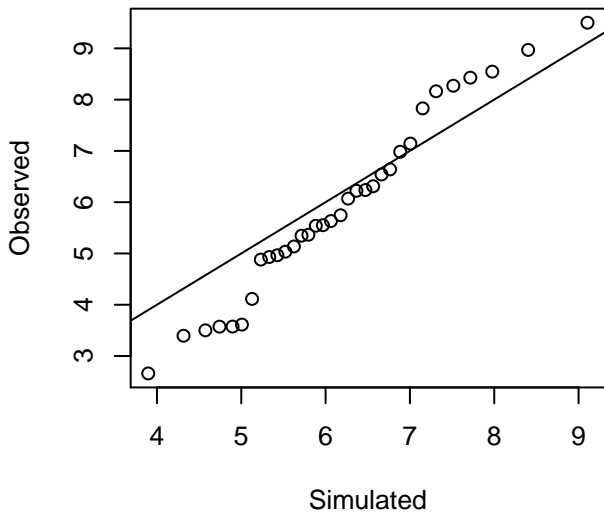

**QQ-plot**  
**MOE<1/3 quantile**

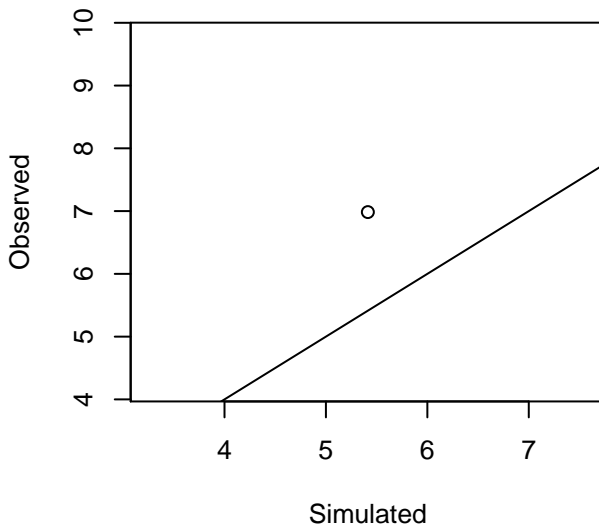

Supplement: Data_Sheet_1.ZIP [file Data_Sheet_1.ZIP]

**QQ-plot**

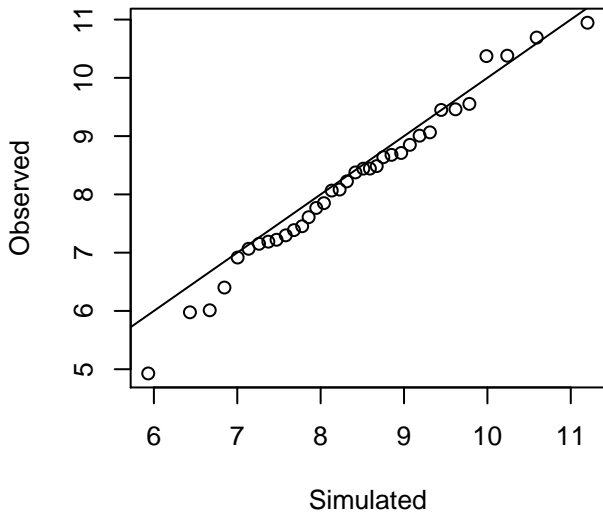

**QQ-plot**  
**MOE < 1/3 quantile**

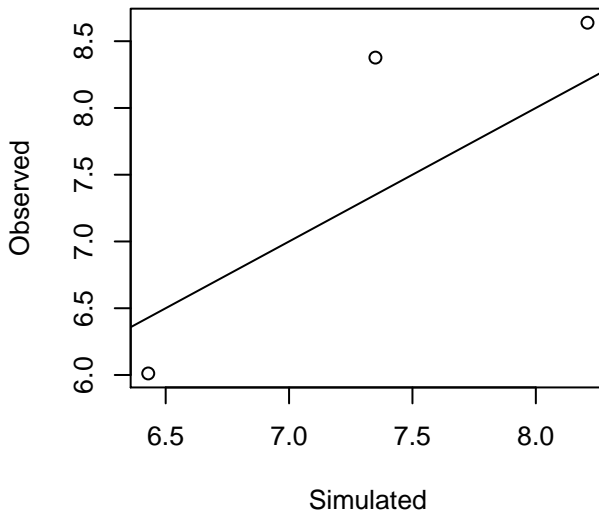

**QQ-plot**  
**MOE between 1/3 and 2/3 quantiles**

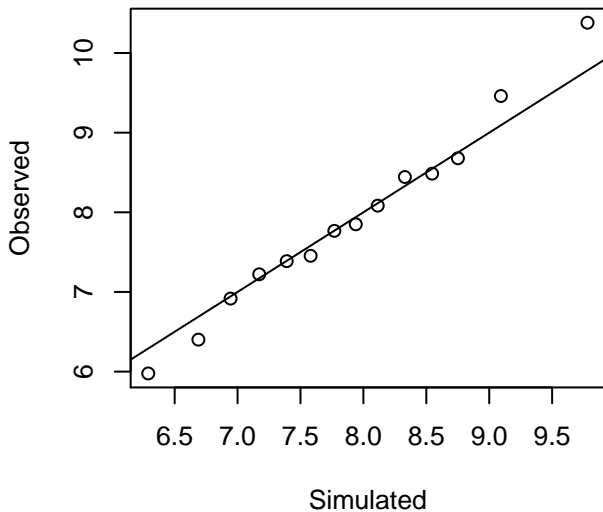

**QQ-plot**  
**MOE > 2/3 quantile**

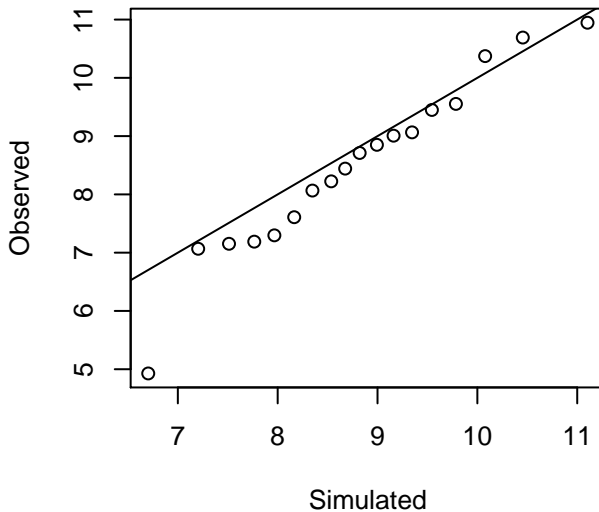

Supplement: Data_Sheet_1.ZIP [file Data_Sheet_1.ZIP]

**QQ-plot**

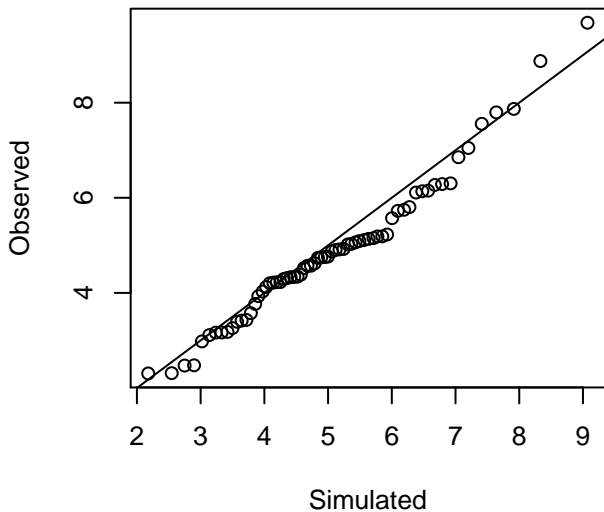

**QQ-plot  
MOE < 1/3 quantile**

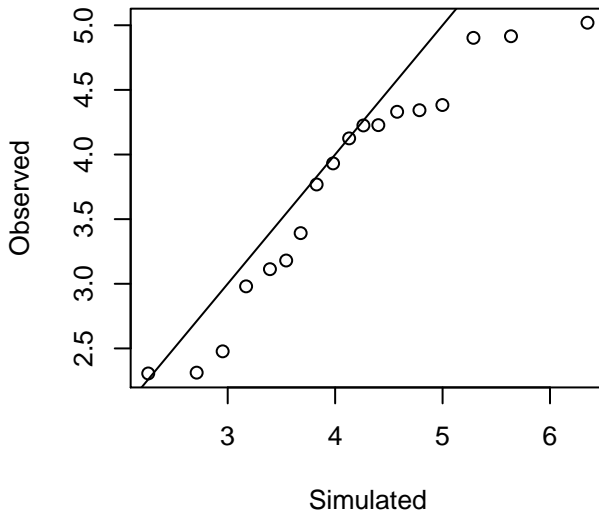

**QQ-plot  
MOE between 1/3 and 2/3 quantiles**

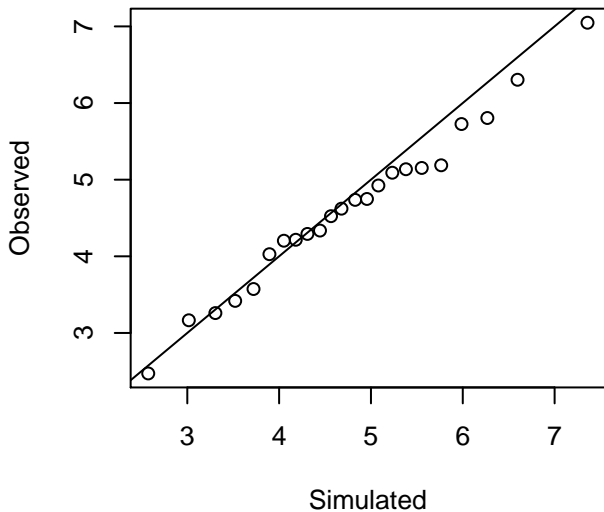

**QQ-plot  
MOE > 2/3 quantile**

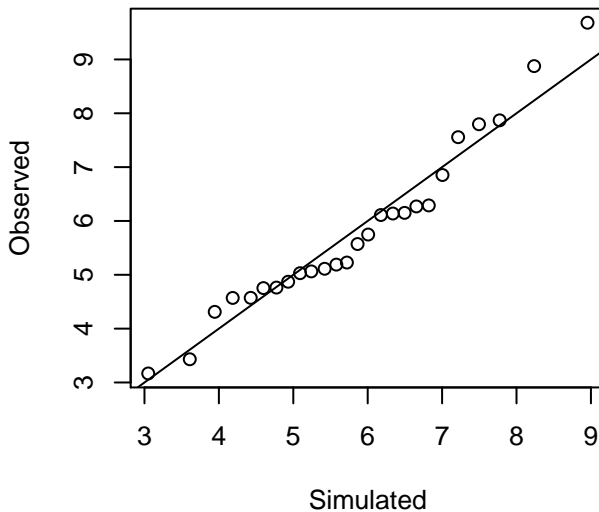

Supplement: Data_Sheet_1.ZIP [file Data_Sheet_1.ZIP]

**QQ-plot**

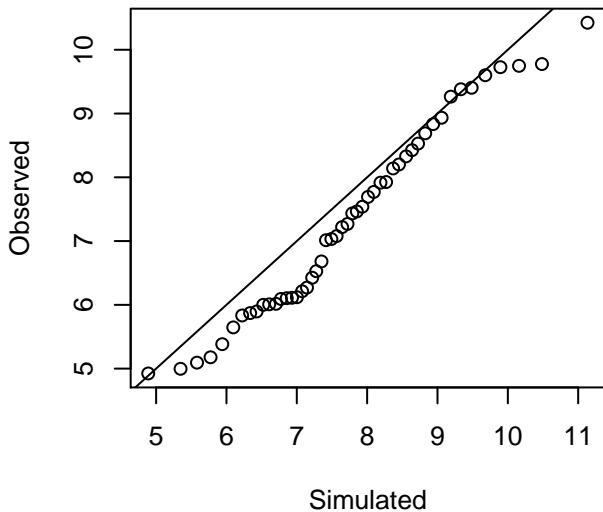

**QQ-plot  
MOE < 1/3 quantile**

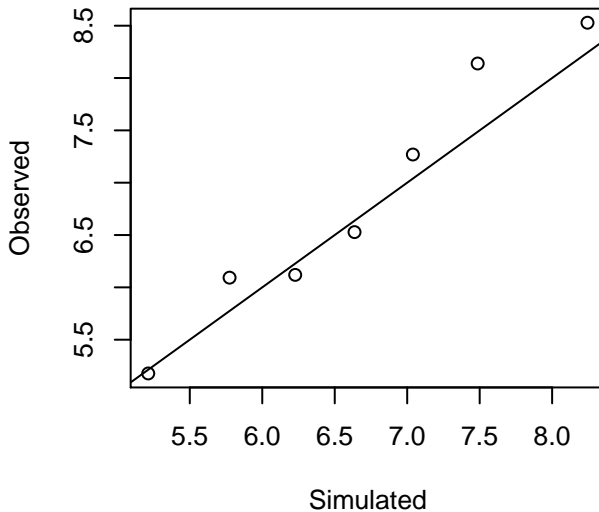

**QQ-plot  
MOE between 1/3 and 2/3 quantiles**

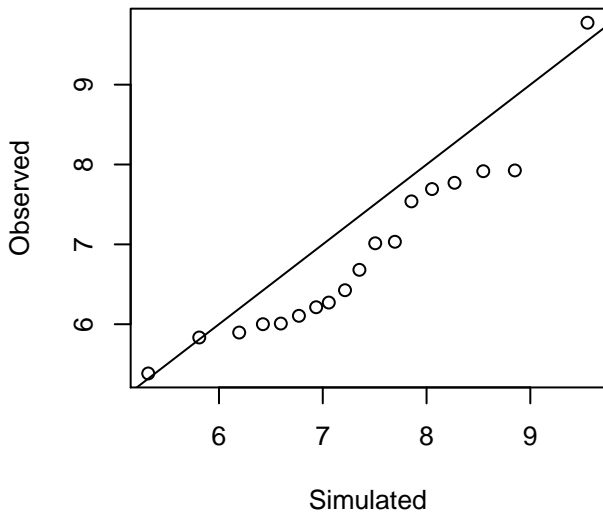

**QQ-plot  
MOE > 2/3 quantile**

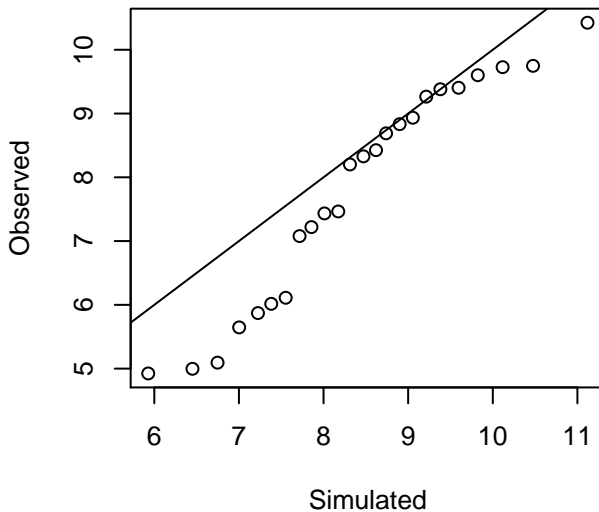

Supplement: Data_Sheet_1.ZIP [file Data_Sheet_1.ZIP]

**QQ-plot**

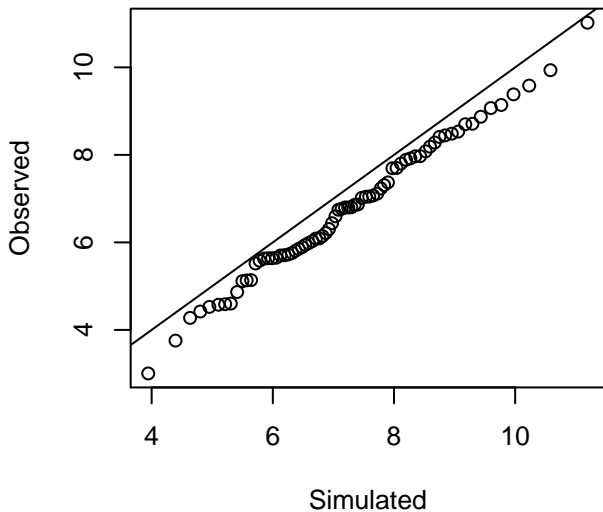

**QQ-plot**  
**MOE < 1/3 quantile**

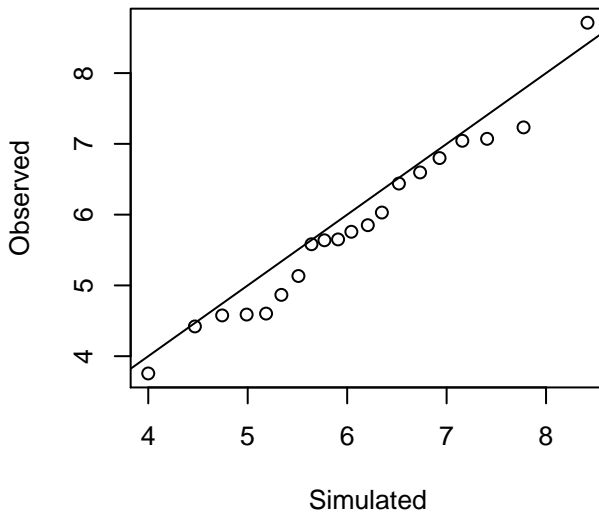

**QQ-plot**  
**MOE between 1/3 and 2/3 quantiles**

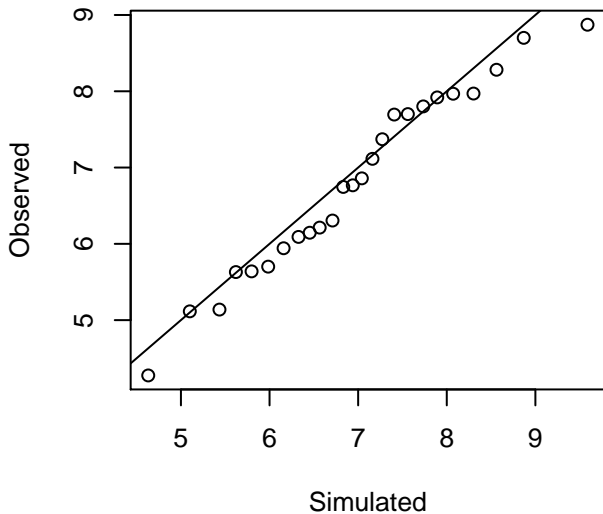

**QQ-plot**  
**MOE > 2/3 quantile**

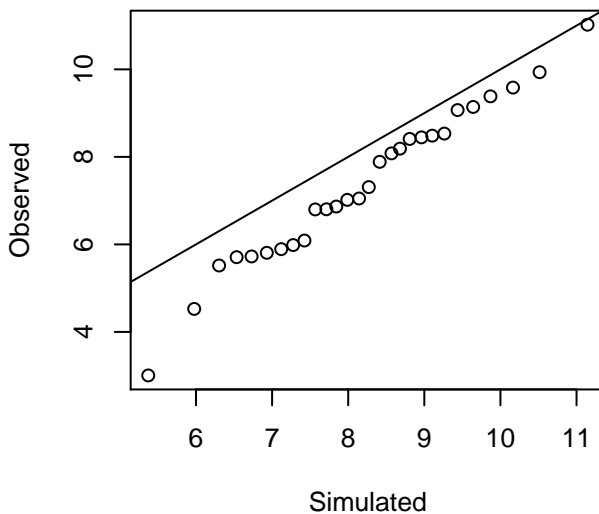

Supplement: Data_Sheet_1.ZIP [file Data_Sheet_1.ZIP]

**QQ-plot**

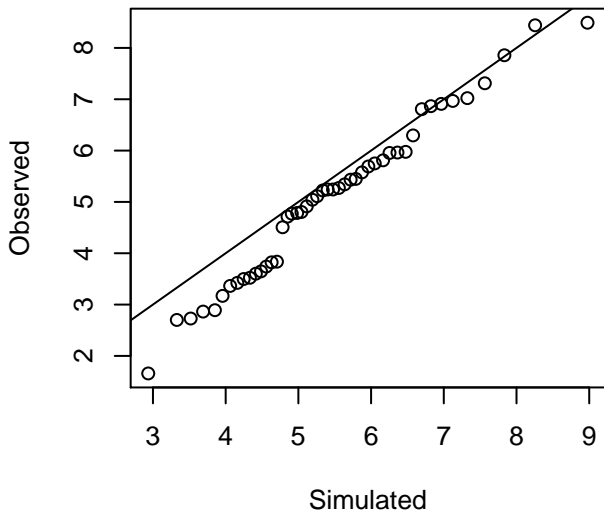

**QQ-plot**  
**MOE<1/3 quantile**

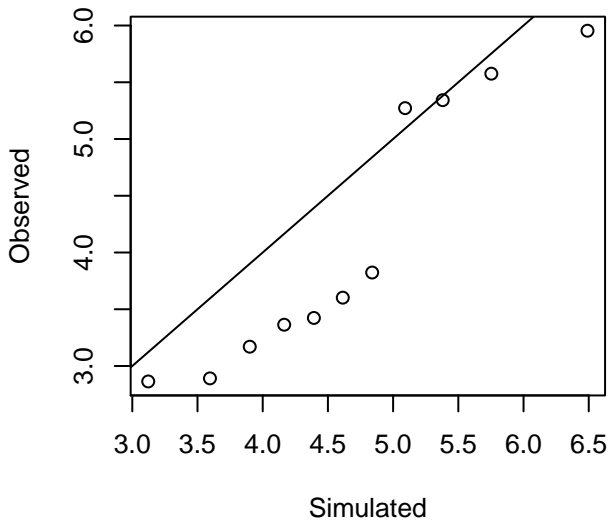

**QQ-plot**  
**MOE between 1/3 and 2/3 quantiles**

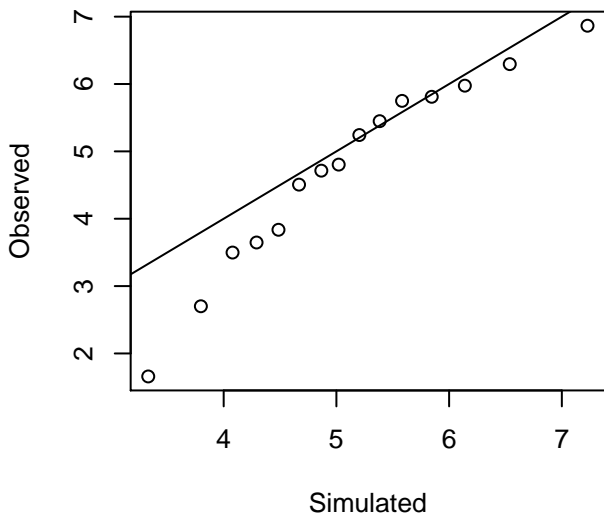

**QQ-plot**  
**MOE>2/3 quantile**

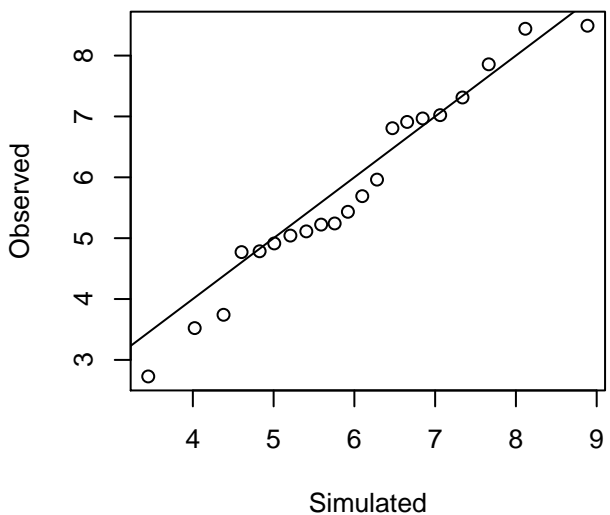

Supplement: Data_Sheet_1.ZIP [file Data_Sheet_1.ZIP]
